# Supplementary material for: Necessity of calcination in the preparation of phosphotungstic acid@TiO2 composites. A case study on the facile sol–gel synthesis of nanospheres and their superior performance in catalytic oxi-desulfurization
Source: Royal Society of Chemistry journal article supplement (doi:10.1039/c7nj01234a), 2017-01-01
Supplement: c7nj01234a1.pdf [file c7nj01234a1.pdf]

## Supporting Information

### Necessarity of calcination in preparation of phosphotungstic acid@TiO<sub>2</sub> composites? A case study on facile sol-gel synthesis of nanospheres and their superior performance in catalytic oxi-desulfurization

Zareen Zuhra, Huan Lei, Zipeng Zhao, Yunshan Zhou\*, Lijuan Zhang\* and Libo Qin

State Key Laboratory of Chemical Resource Engineering, Institute of Science, Beijing University of Chemical Technology, Beijing, 100029, P. R. China

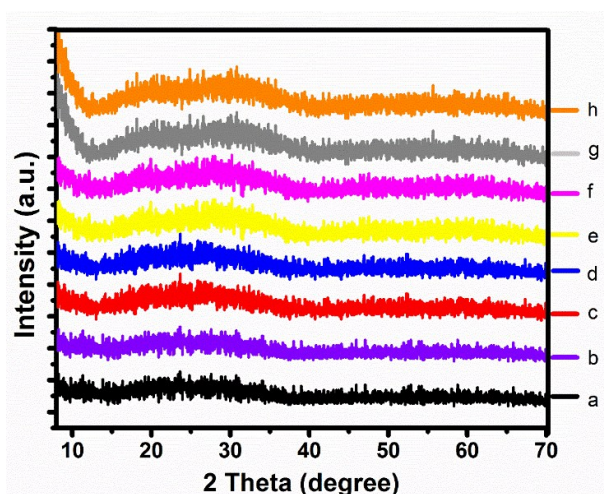

**Fig. S1.** Powder XRD patterns of PW<sub>12</sub>@TiO<sub>2</sub> spherical samples: a. uncal-10\_ PW<sub>12</sub>@TiO<sub>2</sub>, b. cal-10\_ PW<sub>12</sub>@TiO<sub>2</sub>, c. uncal-20\_ PW<sub>12</sub>@TiO<sub>2</sub>, d. cal-20\_ PW<sub>12</sub>@TiO<sub>2</sub>, e. uncal-30\_ PW<sub>12</sub>@TiO<sub>2</sub>, f. cal-30\_ PW<sub>12</sub>@TiO<sub>2</sub>, g. uncal-40\_ PW<sub>12</sub>@TiO<sub>2</sub>, and h. cal-40\_ PW<sub>12</sub>@TiO<sub>2</sub>.

**Table S1.** ICP element analysis results of spherical un-calcinated PW<sub>12</sub>@TiO<sub>2</sub> with different PW<sub>12</sub> loading amounts

| Samples                                            | μg/mL |      |     |      | PW <sub>12</sub> content  |                               |
|----------------------------------------------------|-------|------|-----|------|---------------------------|-------------------------------|
|                                                    | P     | W    | Ti  | W/P  | Gel <sup>a</sup><br>(wt%) | Product <sup>b</sup><br>(wt%) |
| Un-cal_PW <sub>12</sub> @TiO <sub>2</sub> (10 wt%) | 1.15  | 76.5 | 546 | 11.7 | 10                        | 9.5                           |
| Un-cal_PW <sub>12</sub> @TiO <sub>2</sub> (20 wt%) | 2.25  | 214  | 388 | 11.6 | 20                        | 19.6                          |
| Un-cal_PW <sub>12</sub> @TiO <sub>2</sub> (30 wt%) | 3.02  | 260  | 272 | 11.8 | 30                        | 29.3                          |
| Un-cal_PW <sub>12</sub> @TiO <sub>2</sub> (40 wt%) | 4.14  | 321  | 155 | 11.7 | 40                        | 39.4                          |

<sup>a</sup> theoretical loading amount of PW<sub>12</sub> calculated from the ratio of the raw materials during the sample preparation process; <sup>b</sup> actual loading amount of PW<sub>12</sub> calculated from the results of ICP analysis.

The  $PW_{12}$  contents in final un-calcinated products of  $PW_{12}@TiO_2$  catalysts are detected by ICP and are listed in Table S1. The determined loadings of  $PW_{12}$  are found very close to the expected values, indicating minimum loss of  $PW_{12}$  in our prepared process.

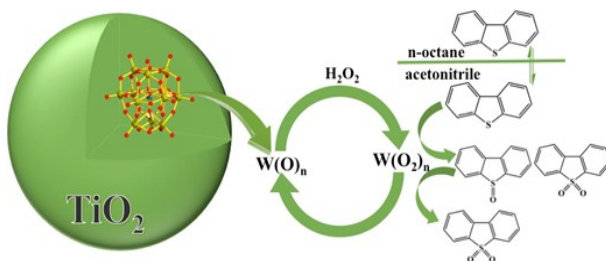

**Scheme S1** The schematic diagram illustrating reaction mechanism of ECODS in this work.

- (i) In the presence of excess amount of  $H_2O_2$ , metal precursor of phosphotungstic acid ( $W(O)_n$ ) is peroxidized and disaggregated to form anionic peroxometal complex ( $W(O_2)_n$ ) and as discussed in the main manuscript the DBT concentration in n-octane phase reached an equilibrium value of 47% in n-octane and 53% in acetonitrile before the addition of catalyst at room temperature, due to liquid–liquid extraction processes.

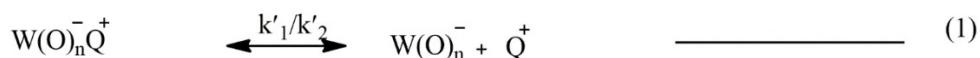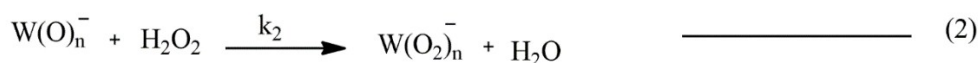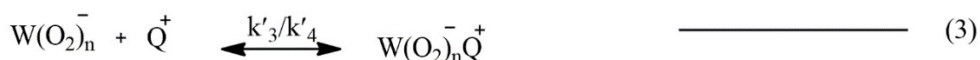

- (ii) DBT is oxidized by the peroxometal complex in the acetonitrile phase rapidly into more polar products, such as sulfoxides and sulfones and these species reside in the polar phase, acetonitrile.

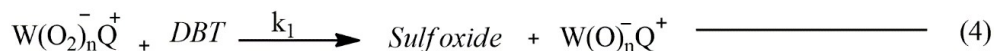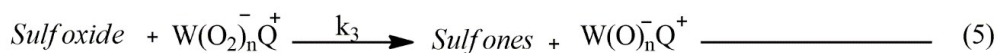

- (iii) The generated reduced species are responsible for continuing the next catalytic cycle. <sup>s1-s7</sup>

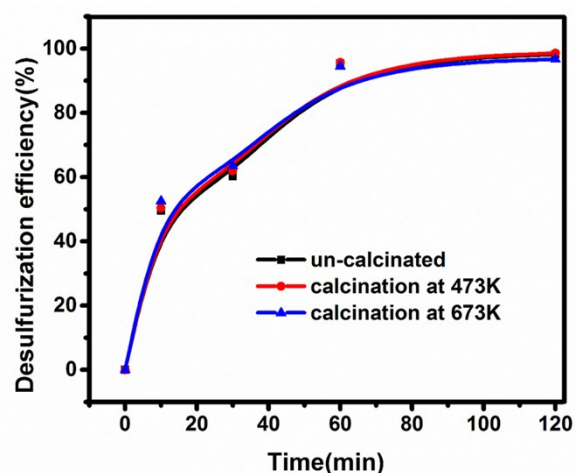

**Fig. S2.** Desulfurization efficiencies of 30\_PW<sub>12</sub>@TiO<sub>2</sub> nano spheres prepared at different calcination temperatures. Reaction condition: O/S, 10; catalyst amount, 0.5% of n-octane; temperature, 60 °C; reaction time, 2h.

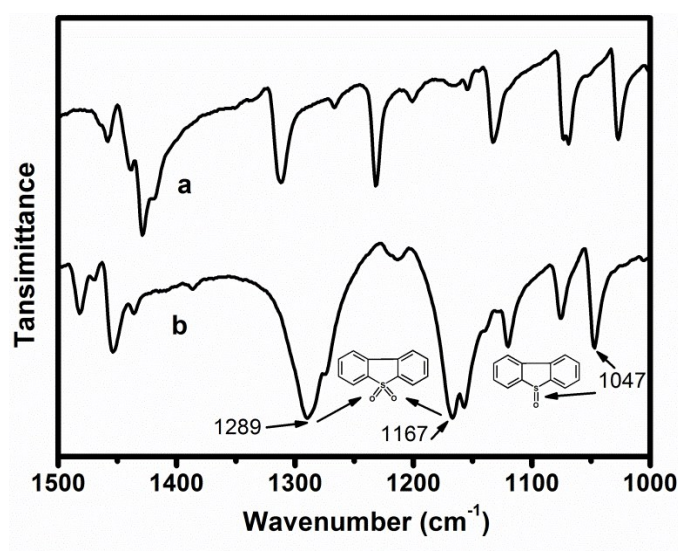

**Fig. S3.** IR spectra of DBT (a) and its oxidation products (b)

In order to estimate the quantity of PW<sub>12</sub> that has lost during the catalytic activity after 10th use of ECODS, the recycled un-calcinated 30\_PW<sub>12</sub>@TiO<sub>2</sub> was subjected to ICP elemental analysis to estimate the quantities of PW<sub>12</sub> content and shown as in table below.

**Table S2.** ICP element analysis results of spherical fresh and 10th used un-calcinated 30\_PW<sub>12</sub>@TiO<sub>2</sub>

| Samples                                                                  | $\mu\text{g/mL}$ |     |     |      | PW <sub>12</sub> content  |                               |
|--------------------------------------------------------------------------|------------------|-----|-----|------|---------------------------|-------------------------------|
|                                                                          | P                | W   | Ti  | W/P  | Gel <sup>a</sup><br>(wt%) | Product <sup>b</sup><br>(wt%) |
| Un-cal_PW <sub>12</sub> @TiO <sub>2</sub> (Fresh 30 wt%)                 | 3.02             | 260 | 272 | 11.8 | 30                        | 29.3                          |
| Un-cal_PW <sub>12</sub> @TiO <sub>2</sub> (10 <sup>th</sup> used 30 wt%) | 2.95             | 254 | 270 | 11.7 | -                         | 28.6                          |

<sup>a</sup> theoretical loading amount of PW<sub>12</sub> calculated from the ratio of the raw materials during the sample preparation process; <sup>b</sup> actual loading amount of PW<sub>12</sub> calculated from the results of ICP analysis.

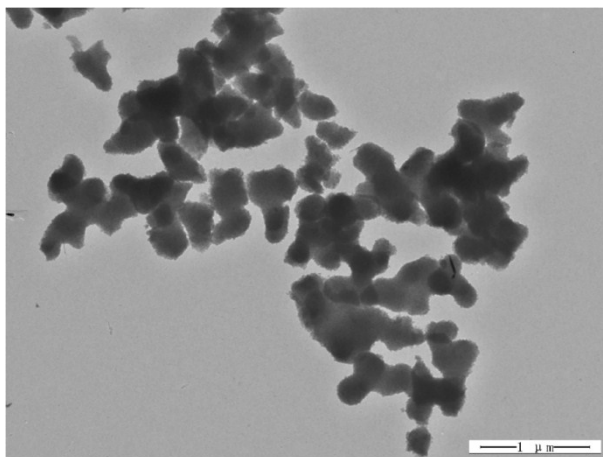

**Fig. S4.** TEM image of uncal-30\_PW<sub>12</sub>@TiO<sub>2</sub> after 10th catalytic cycle.

## References

- s1. H. Lu, J. Gao, Z. Jiang, F. Jing, Y. Yang, G. Wang, C. Li, J. Catal. 239 (2006) 369–375
- s2. J. Gao, Wang, Jiang, Lu, Yang, Jing, Li, J. Mol. Catal. A: Chem. 258 (2006) 261–266
- s3. L. Cedeño-Caero, H. Gomez-Bernal, A. Fraustro-Cuevas, H.D. Guerra-Gomez, R. Cuevas-Garcia, Catal. Today 133–135 (2008) 244–254
- s4. F. Al-Shahrani, T. Xiao, S.A. Llewellyn, S. Barric, Z. Jiang, H. Shi, G. Martinie, M.L.H. Green, Appl. Catal. A Gen. 73 (2007) 311–316
- s5. D.H. Wang, E.W. Qian, H. Amano, K. Okata, A. Ishihara, T. Kabe, Appl. Catal. A Gen. 253 (2003) 91–99
- s6. J.L. García-Gutiérrez, G.A. Fuentes, M.E. Hernández-Teraín, F. Murrieta, J. Navarrete, F. Jiménez-Cruz, Appl. Catal. A Gen. 305 (2006) 15–20.
- s7. J.L. García-Gutiérrez, G.A. Fuentes, M.E. Hernández-Terán, P. García, F. Murrieta Guevara, F. Jiménez-Cruz, Appl. Catal., A 334 (2008) 366–373.
